# Supplementary material
Source: PubMed Central journal article supplement (PMC4938772)
Supplement: NIHMS738341-supplement-supplement_1.pdf [file NIHMS738341-supplement-supplement_1.pdf]

Table S1

*Stability and Inter-trait Correlations of Mean Parent Ratings of IN, HI, and SCT*

| Measure/Wave                     | Correlations between same dimensions at different time points |        |          |          |          |          |
|----------------------------------|---------------------------------------------------------------|--------|----------|----------|----------|----------|
|                                  | Preschool                                                     | Post K | Post 1st | Post 2nd | Post 4th | Post 9th |
| <b>Inattention</b>               |                                                               |        |          |          |          |          |
| Preschool                        | –                                                             | .57    | .50      | .46      | .46      | .42      |
| Post K                           |                                                               | –      | .65      | .63      | .56      | .43      |
| Post 1st                         |                                                               |        | –        | .67      | .64      | .48      |
| Post 2nd                         |                                                               |        |          | –        | .72      | .49      |
| Post 4th                         |                                                               |        |          |          | –        | .57      |
| Post 9th                         |                                                               |        |          |          |          | –        |
| <b>Hyperactivity/Impulsivity</b> |                                                               |        |          |          |          |          |
| Preschool                        | –                                                             | .64    | .56      | .58      | .51      | .46      |
| Post K                           |                                                               | –      | .67      | .70      | .64      | .38      |
| Post 1st                         |                                                               |        | –        | .66      | .66      | .39      |
| Post 2nd                         |                                                               |        |          | –        | .71      | .53      |
| Post 4th                         |                                                               |        |          |          | –        | .50      |
| Post 9th                         |                                                               |        |          |          |          | –        |
| <b>Sluggish Cognitive Tempo</b>  |                                                               |        |          |          |          |          |
| Preschool                        | –                                                             | .64    | .55      | .48      | .44      | .39      |
| Post K                           |                                                               | –      | .65      | .68      | .60      | .43      |
| Post 1st                         |                                                               |        | –        | .70      | .65      | .52      |
| Post 2nd                         |                                                               |        |          | –        | .71      | .49      |
| Post 4th                         |                                                               |        |          |          | –        | .59      |
| Post 9th                         |                                                               |        |          |          |          | –        |
|                                  | Correlations between different dimensions at same time point  |        |          |          |          |          |
| IN–HI                            | .59                                                           | .55    | .57      | .57      | .56      | .54      |
| IN–SCT                           | .53                                                           | .69    | .66      | .73      | .72      | .66      |
| HI–SCT                           | .34                                                           | .35    | .43      | .41      | .45      | .31      |

*Note.* Latent correlations depicted in Table 3 are higher than correlations here due to the inclusion of measurement error. IN = inattention; HI = hyperactivity/impulsivity; SCT = sluggish cognitive tempo.

All  $p < .001$
